# Supplementary material
Source: PubMed Central journal article supplement (PMC3222227)
Supplement: NIHMS336818-supplement-Table_A1.pdf [file NIHMS336818-supplement-Table_A1.pdf]

## Supplementary Information: Table 1: RNA binding proteins studied by CLIP

| RNABP            | Method                   | Tissue/cell type                           | Principle findings                                                                                                                | Reference                                                            |
|------------------|--------------------------|--------------------------------------------|-----------------------------------------------------------------------------------------------------------------------------------|----------------------------------------------------------------------|
| Nova             | CLIP<br>and<br>HITS-CLIP | Mouse brain                                | Binding motif<br>Biologically coherent targets<br>RNA splicing map<br>Regulation of poly(A) usage<br>3' UTR localization elements | (Ule et al. 2003)<br>(Licatalosi et al. 2008)<br>(Racca et al. 2010) |
| PTB              | HITS-CLIP                | HeLa cells                                 | Binding motif<br>RNA splicing map                                                                                                 | (Xue et al. 2009)                                                    |
| Tagged-Khd1      | HITS-CLIP                | Saccharomyces cerevisiae                   | Binding motif<br>Biologically coherent targets<br>Discovery of role in translational regulation                                   | (Wolf and Fink 2010)                                                 |
| hnRNP A1         | CLIP                     | HeLa cells                                 | Discovery of role in regulating pri-mRNA processing                                                                               | (Guil and Caceres 2007)                                              |
| Fox2             | HITS-CLIP                | Human embryonic stem cells                 | Biologically coherent targets<br>RNA splicing map                                                                                 | (Yeo et al. 2009)                                                    |
| SFRS1            | CLIP<br>& HITS-CLIP      | HEK293T cells                              | Binding motif<br>Sites relevant to disease                                                                                        | (Sanford et al. 2008)<br>(Sanford et al. 2009)                       |
| Tagged-Rrm4      | CLIP                     | Filamentous fungus <i>Ustilago maydis</i>  | Binding motif<br>Localization of rrm4-RNPs                                                                                        | (Becht et al. 2006)                                                  |
| CUGBP1           | CLIP                     | Mouse hindbrain                            | Binding motif<br>Validation of splicing target                                                                                    | (Daughters et al. 2009)                                              |
| Tagged-snRNPs    | HITS-CLIP                | Saccharomyces cerevisiae                   | Detailed mapping of protein-rRNA and snoRNA interaction sites                                                                     | (Granneman et al. 2009)<br>(Bohnsack et al. 2009)                    |
| Ro homologue Rsr | CLIP                     | Eubacterium <i>Deinococcus radiodurnas</i> | Discovery of interaction with rRNA                                                                                                | (Wurtmann and Wolin 2010)                                            |
| hnRNP C          | HITS-CLIP                | HeLa cells                                 | Binding motif<br>RNA splicing map<br>Discovery of hnRNP particle organization related to splicing                                 | (Konig et al. 2010)                                                  |
| Ago              | HITS-CLIP                | Mouse brain; HeLa                          | Ago-miRNA binding sites defined                                                                                                   | (Chi et al. 2009)                                                    |
| Tagged-Ago       | PAR-CLIP                 | HEK293 cells                               | Ago-miRNA binding sites defined                                                                                                   | (Hafner et al. 2010)                                                 |
| Alg-1            | HITS-CLIP                | <i>C. elegans</i>                          | Alg-1-miRNA binding sites defined                                                                                                 | (Zisoulis et al. 2010)                                               |
| Msy2             | CLIP                     | Mouse seminiferous tubules                 | Discovery of interaction with piRNAs, other small RNAs                                                                            | (Xu et al. 2009)                                                     |
